# Supplementary material for: Accounting for molecular flexibility in photoionization: case of tert-butyl hydroperoxide
Source: Royal Society of Chemistry journal article supplement (doi:10.1039/d2cp00929c), 2022-01-01
Supplement: d2cp00929c1.pdf [file d2cp00929c1.pdf]

## SUPPLEMENTARY INFORMATION

# Accounting for Molecular Flexibility in Photoionization: Case of *tert*-Butyl Hydroperoxide

Jérémy Bourgalais<sup>1,\*</sup>, Zhongming Jiang<sup>2</sup>, Julien Bloino<sup>2</sup>, Olivier Herbinet<sup>1</sup>, Hans-Heinrich Carstensen<sup>3,4</sup>,  
Gustavo A. Garcia<sup>5</sup>, Philippe Arnoux<sup>1</sup>, Luc-Sy Tran<sup>6</sup>, Guillaume Vanhove<sup>6</sup>, Laurent Nahon<sup>5</sup>, Frédérique  
Battin-Leclerc<sup>1</sup>, and Majdi Hochlaf<sup>7,\*</sup>

<sup>1</sup>Université de Lorraine, CNRS, LRGP, F-54000 Nancy, France.

<sup>2</sup>SMART Laboratory, Scuola Normale Superiore, Pisa, Italy.

<sup>3</sup>Thermochemical Processes Group (GPT), Department of Chemical and Environmental Engineering, Engineering and Architecture School, University of Zaragoza, Spain

<sup>4</sup>Fundacion Agencia Aragonesa para la Investigacion y el Desarrollo (ARAID), Zaragoza, Spain

<sup>5</sup>Synchrotron SOLEIL, L'Orme des Merisiers, Saint-Aubin-BP 48, 91192 Gif-sur-Yvette Cedex, France

<sup>6</sup>PC2A, Université de Lille, CNRS; Avenue Mendeleiev, 59650 Villeneuve-d'Ascq, France

<sup>7</sup>Université Gustave Eiffel, COSYS/LISIS, 5 Bd Descartes 77454, Champs sur Marne, France

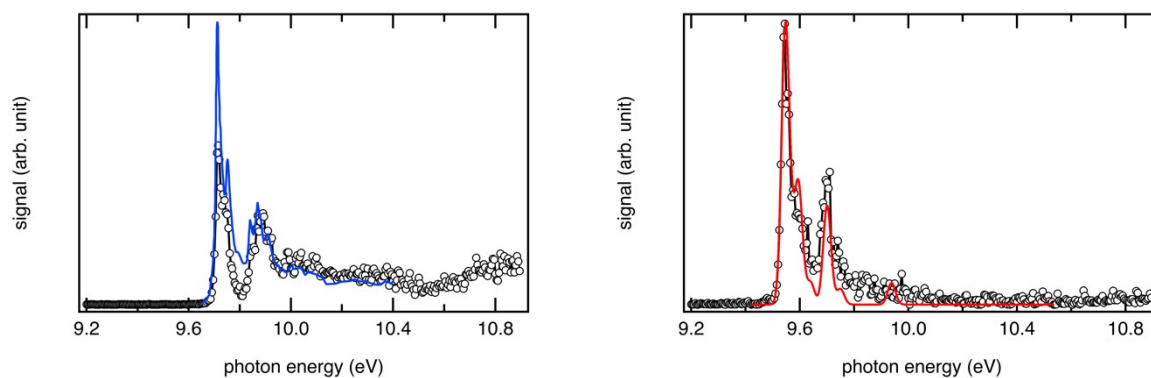

FIGURE S1. (left) SPES of  $m/z$  58 (open circles) recorded during synchrotron photoionization of a tBuOOH/*n*-decane mixture in helium compared to TPES of acetone (blue line) from Rennie et al. [61]; (right) SPES of  $m/z$  72 (black dots) recorded during synchrotron photoionization of a tBuOOH/*n*-decane mixture in helium compared to a simulated PES of methyl ethyl ketone (red line) from Bourgalais et al. [62].

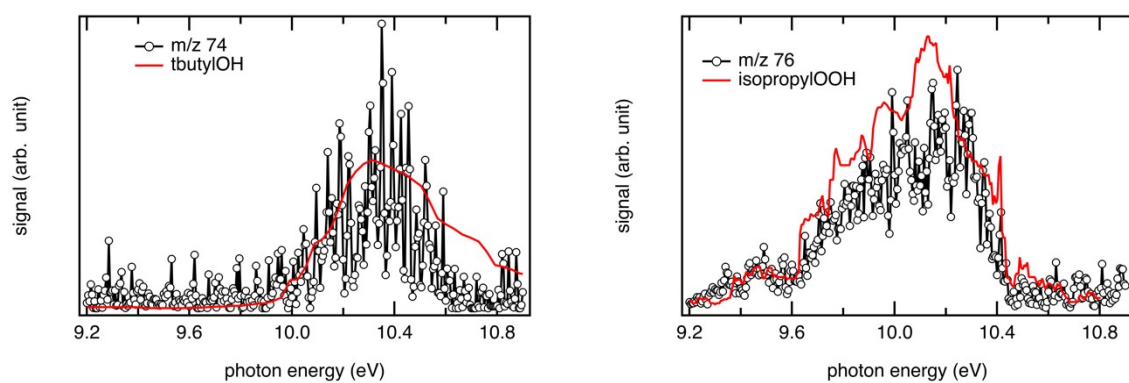

FIGURE S2. (left) SPES of  $m/z$  74 (black dots) recorded during synchrotron photoionization of a tBuOOH/*n*-decane mixture in helium compared to a published spectrum of tBuOH (red line) from Ogata et al. [63]; (right) SPES of  $m/z$  76 (black dots) recorded during synchrotron photoionization of a tBuOOH/*n*-decane mixture in helium compared to the spectrum of isopropyl hydroperoxide (red line) reported by Bierkandt et al. [5].

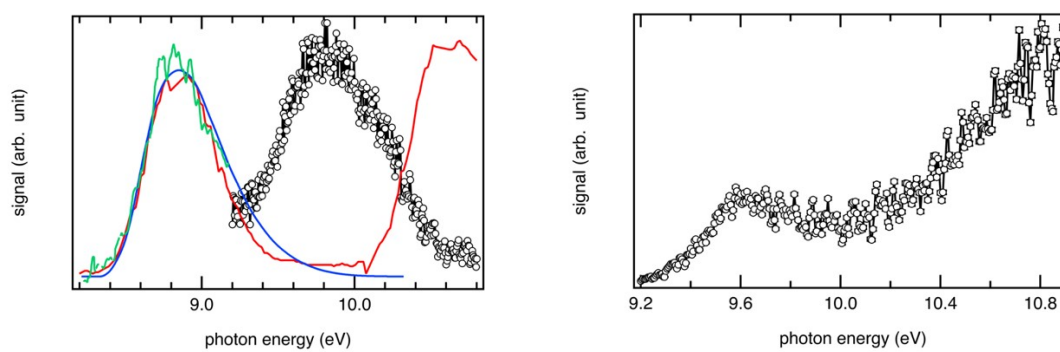

FIGURE S3. SPES of  $m/z$  146 (open circles) recorded during synchrotron photoionization of a  $t\text{BuOOH}/n\text{-decane}$  mixture in helium compared to a referenced PES of di- $t\text{BuO}$  (red line) from Batch & Adam [50], a TPEPICO spectrum of di- $t\text{BuO}$  (green line) from Shuman et al. [49], and a simulated spectrum of di- $t\text{BuO}$  (blue line); (right) SPES of  $m/z$  73 (black dots) recorded during synchrotron photoionization of a  $t\text{BuOOH}/n\text{-decane}$  mixture in helium.

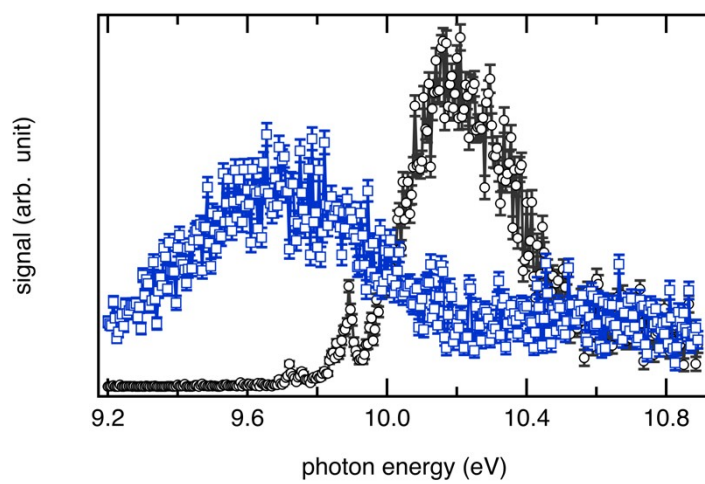

FIGURE S4. SPES of  $m/z$  59 (open circles) and 180 (blue squares) recorded during synchrotron photoionization of a tBuOOH/*n*-decane mixture in helium.

TABLE S1. PBE0/aug-cc-pVTZ optimized equilibrium geometry of neutral and cationic tBuOOH.

Distances are in Å and angles in degrees. See FIGURE 6 for the numbering of the atoms.

|             | tBuOOH | tBuOOH <sup>+</sup> |
|-------------|--------|---------------------|
| R(1,2)      | 1.520  | 1.499               |
| R(1,6)      | 1.520  | 1.518               |
| R(1,10)     | 1.520  | 1.518               |
| R(1,14)     | 1.438  | 1.546               |
| R(2,3)      | 1.091  | 1.090               |
| R(2,4)      | 1.090  | 1.090               |
| R(2,5)      | 1.092  | 1.091               |
| R(6,7)      | 1.091  | 1.089               |
| R(6,8)      | 1.091  | 1.092               |
| R(6,9)      | 1.091  | 1.090               |
| R(10,11)    | 1.091  | 1.092               |
| R(10,12)    | 1.091  | 1.089               |
| R(10,13)    | 1.092  | 1.090               |
| R(14,15)    | 1.427  | 1.307               |
| R(15,16)    | 0.963  | 0.982               |
| A(2,1,6)    | 111.2  | 114.8               |
| A(2,1,10)   | 111.6  | 114.8               |
| A(2,1,14)   | 110.1  | 110.3               |
| A(6,1,10)   | 111.1  | 113.0               |
| A(6,1,14)   | 101.9  | 101.0               |
| A(10,1,14)  | 110.5  | 100.7               |
| A(1,2,3)    | 110.3  | 112.4               |
| A(1,2,4)    | 110.7  | 112.4               |
| A(1,2,5)    | 110.2  | 106.7               |
| A(3,2,4)    | 108.5  | 109.7               |
| A(3,2,5)    | 108.5  | 107.6               |
| A(4,2,5)    | 108.4  | 107.6               |
| A(1,6,7)    | 110.5  | 111.6               |
| A(1,6,8)    | 109.7  | 106.7               |
| A(1,6,9)    | 110.8  | 112.0               |
| A(7,6,8)    | 108.5  | 108.5               |
| A(7,6,9)    | 108.6  | 110.0               |
| A(8,6,9)    | 108.5  | 107.9               |
| A(1,10,11)  | 110.2  | 106.7               |
| A(1,10,12)  | 110.9  | 111.6               |
| A(1,10,13)  | 110.5  | 112.0               |
| A(11,10,12) | 107.8  | 108.5               |
| A(11,10,13) | 108.2  | 107.9               |
| A(12,10,13) | 109.0  | 110.0               |
| A(1,14,15)  | 109.6  | 114.1               |

|               |        |        |
|---------------|--------|--------|
| A(14,15,16)   | 101.1  | 103.8  |
| D(6,1,2,3)    | -55.7  | -51.0  |
| D(6,1,2,4)    | -175.9 | -175.5 |
| D(6,1,2,5)    | 64.1   | 66.7   |
| D(10,1,2,3)   | 179.5  | 175.5  |
| D(10,1,2,4)   | 59.4   | 51.1   |
| D(10,1,2,5)   | -60.5  | -66.7  |
| D(14,1,2,3)   | 56.4   | 62.2   |
| D(14,1,2,4)   | -63.8  | -62.2  |
| D(14,1,2,5)   | 176.3  | -180.0 |
| D(2,1,6,7)    | 57.9   | 50.0   |
| D(2,1,6,8)    | -61.8  | -68.3  |
| D(2,1,6,9)    | 178.4  | 173.8  |
| D(10,1,6,7)   | -177.1 | -175.7 |
| D(10,1,6,8)   | 63.2   | 66.0   |
| D(10,1,6,9)   | -56.6  | -51.9  |
| D(14,1,6,7)   | -59.3  | -69.0  |
| D(14,1,6,8)   | -179.0 | 173.0  |
| D(14,1,6,9)   | 61.1   | 55.1   |
| D(2,1,10,11)  | 62.0   | 68.3   |
| D(2,1,10,12)  | -57.4  | -50.0  |
| D(2,1,10,13)  | -178.4 | -173.8 |
| D(6,1,10,11)  | -62.7  | -66.0  |
| D(6,1,10,12)  | 177.9  | 175.7  |
| D(6,1,10,13)  | 56.8   | 51.9   |
| D(14,1,10,11) | -175.1 | -173.0 |
| D(14,1,10,12) | 65.5   | 68.7   |
| D(14,1,10,13) | -55.5  | -55.1  |
| D(2,1,14,15)  | 60.3   | 0.0    |
| D(6,1,14,15)  | 178.4  | 121.8  |
| D(10,1,14,15) | -63.5  | -122.0 |
| D(1,14,15,16) | 110.1  | -180.0 |

TABLE S2. Anharmonic frequencies ( $\nu^+$ ,  $\text{cm}^{-1}$ ) of tBuOOH<sup>+</sup> electronic ground state as computed at the PBE0/aug-cc-pVTZ level, using the VPT2 theory to describe the nuclear motions as implemented in GAUSSIAN 16. We also give their tentative assignment in terms of normal modes and atomic displacements.  $\nu$ : stretching;  $\delta$ : bending;  $\gamma$ : rocking;  $\tau$ : torsion. s: symmetric; and as: asymmetric.

| mode | $\nu^+$ | Assign.               | Displ.                                                                              | mode | $\nu^+$ | Assign.               | Displ.                                                                                |
|------|---------|-----------------------|-------------------------------------------------------------------------------------|------|---------|-----------------------|---------------------------------------------------------------------------------------|
| 1    | 3413.0  | $\nu(\text{OH})$      | 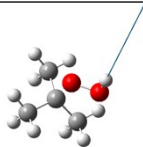   | 22   | 1196.5  | $\nu(\text{CC})$      |    |
| 2    | 3026.4  | $\nu(\text{CH}_3)$ s  |    | 23   | 1189.9  | $\nu(\text{OO})$      |    |
| 3    | 3026.1  | $\nu(\text{CH}_3)$ as |    | 24   | 1085.1  | $\gamma(\text{CH}_3)$ |    |
| 4    | 3022.3  | $\nu(\text{CH}_3)$ as |   | 25   | 1023.1  | $\gamma(\text{CH}_3)$ |   |
| 5    | 3022.4  | $\nu(\text{CH}_3)$ s  |  | 26   | 993.4   | $\gamma(\text{CH}_3)$ |  |
| 6    | 3011.9  | $\nu(\text{CH}_3)$ s  |  | 27   | 963.2   | $\gamma(\text{CH}_3)$ |  |
| 7    | 3018.0  | $\nu(\text{CH}_3)$ as |  | 28   | 907.7   | $\gamma(\text{CH}_3)$ |  |
| 8    | 2956.9  | $\nu(\text{CH}_3)$ s  |  | 29   | 903.3   | $\gamma(\text{CH}_3)$ |  |
| 9    | 2946.8  | $\nu(\text{CH}_3)$ s  |  | 30   | 754.3   | $\nu(\text{CC})$      |  |



|    |        |                       |                                                                                     |    |       |                       |                                                                                       |
|----|--------|-----------------------|-------------------------------------------------------------------------------------|----|-------|-----------------------|---------------------------------------------------------------------------------------|
| 10 | 2939.6 | $\nu(\text{CH}_3)$ s  | 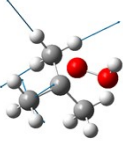   | 31 | 573.1 | $\delta(\text{OOH})$  |    |
| 11 | 1464.6 | $\gamma(\text{CH}_3)$ |    | 32 | 524.0 | $\gamma(\text{OOH})$  |    |
| 12 | 1446.9 | $\delta(\text{OOH})$  |    | 33 | 407.5 | $\nu(\text{CO})$      |    |
| 13 | 1440.4 | $\gamma(\text{CH}_3)$ |    | 34 | 394.9 | $\gamma(\text{CH}_3)$ |    |
| 14 | 1428.7 | $\gamma(\text{CH}_3)$ |   | 35 | 342.6 | $\nu(\text{CO})$      |   |
| 15 | 1421.4 | $\gamma(\text{CH}_3)$ |  | 36 | 299.1 | $\delta(\text{CCC})$  |  |
| 16 | 1409.2 | $\gamma(\text{CH}_3)$ |  | 37 | 310.6 | $\delta(\text{CCC})$  |  |
| 17 | 1405.2 | $\gamma(\text{CH}_3)$ |  | 38 | 272.6 | $\delta(\text{OOC})$  |  |
| 18 | 1391.3 | $\nu(\text{CC})$      |  | 39 | 273.2 | $\tau(\text{C-C})$    |  |
| 19 | 1360.7 | $\gamma(\text{CH}_3)$ |  | 40 | 232.2 | $\tau(\text{C-C})$    |  |

|    |        |                    |                                                                                   |    |       |                      |                                                                                     |
|----|--------|--------------------|-----------------------------------------------------------------------------------|----|-------|----------------------|-------------------------------------------------------------------------------------|
| 20 | 1353.2 | $\nu(\text{CH}_3)$ | 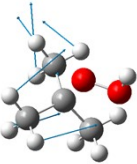 | 41 | 178.3 | $\tau(\text{C-C})$   |  |
| 21 | 1251.8 | $\nu(\text{CC})$   |  | 42 | 23.7  | $\delta(\text{OOH})$ |  |

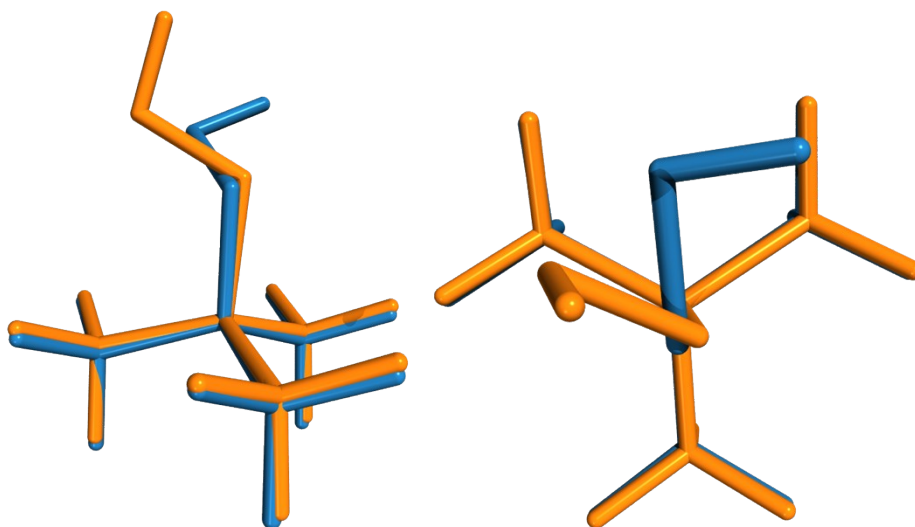

FIGURE S5: Overlapping optimized structures of tBuOOH (blue) and tBuOOH<sup>+</sup> (orange) at the PBE0/aug-cc-pVTZ levels. The 4 carbon atoms were used in the mass-weighted superposition procedure.

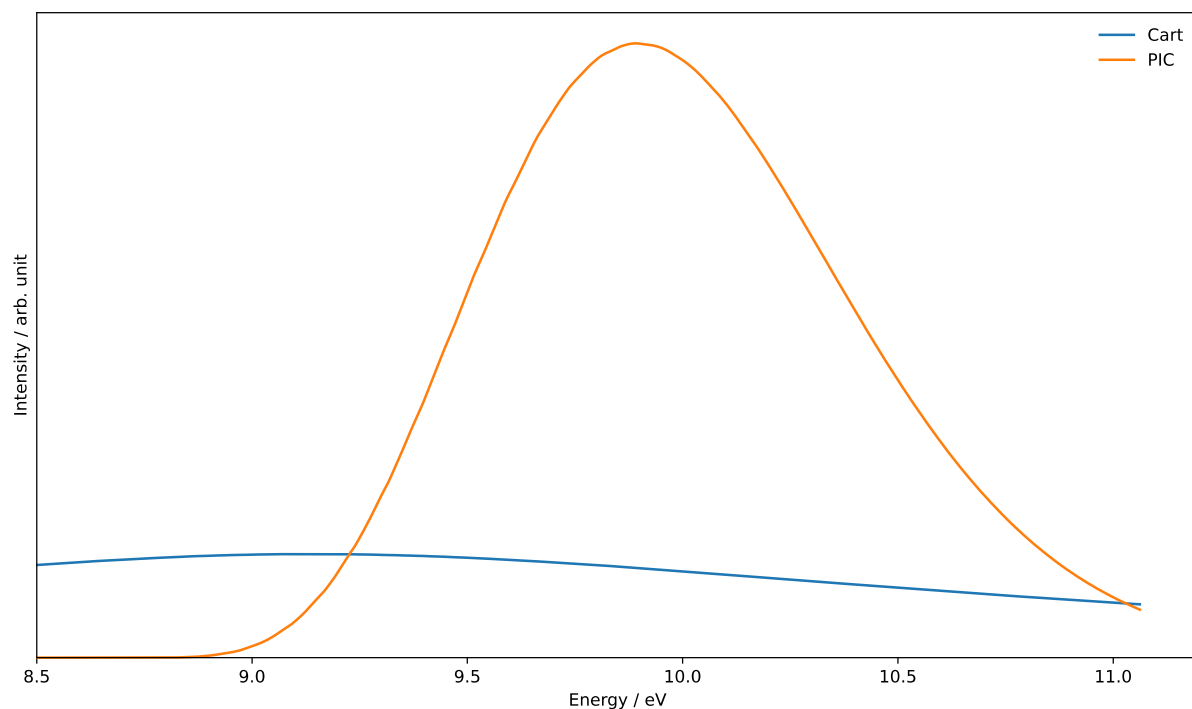

FIGURE S6: Full-dimensional PES spectrum at the FC level using the time-dependent formalism at 0K using Cartesian-based (Cart) or internal-based (PIC) normal coordinates. Gaussian distribution functions with HWHMs of 20 meV were used for the empirical broadening.

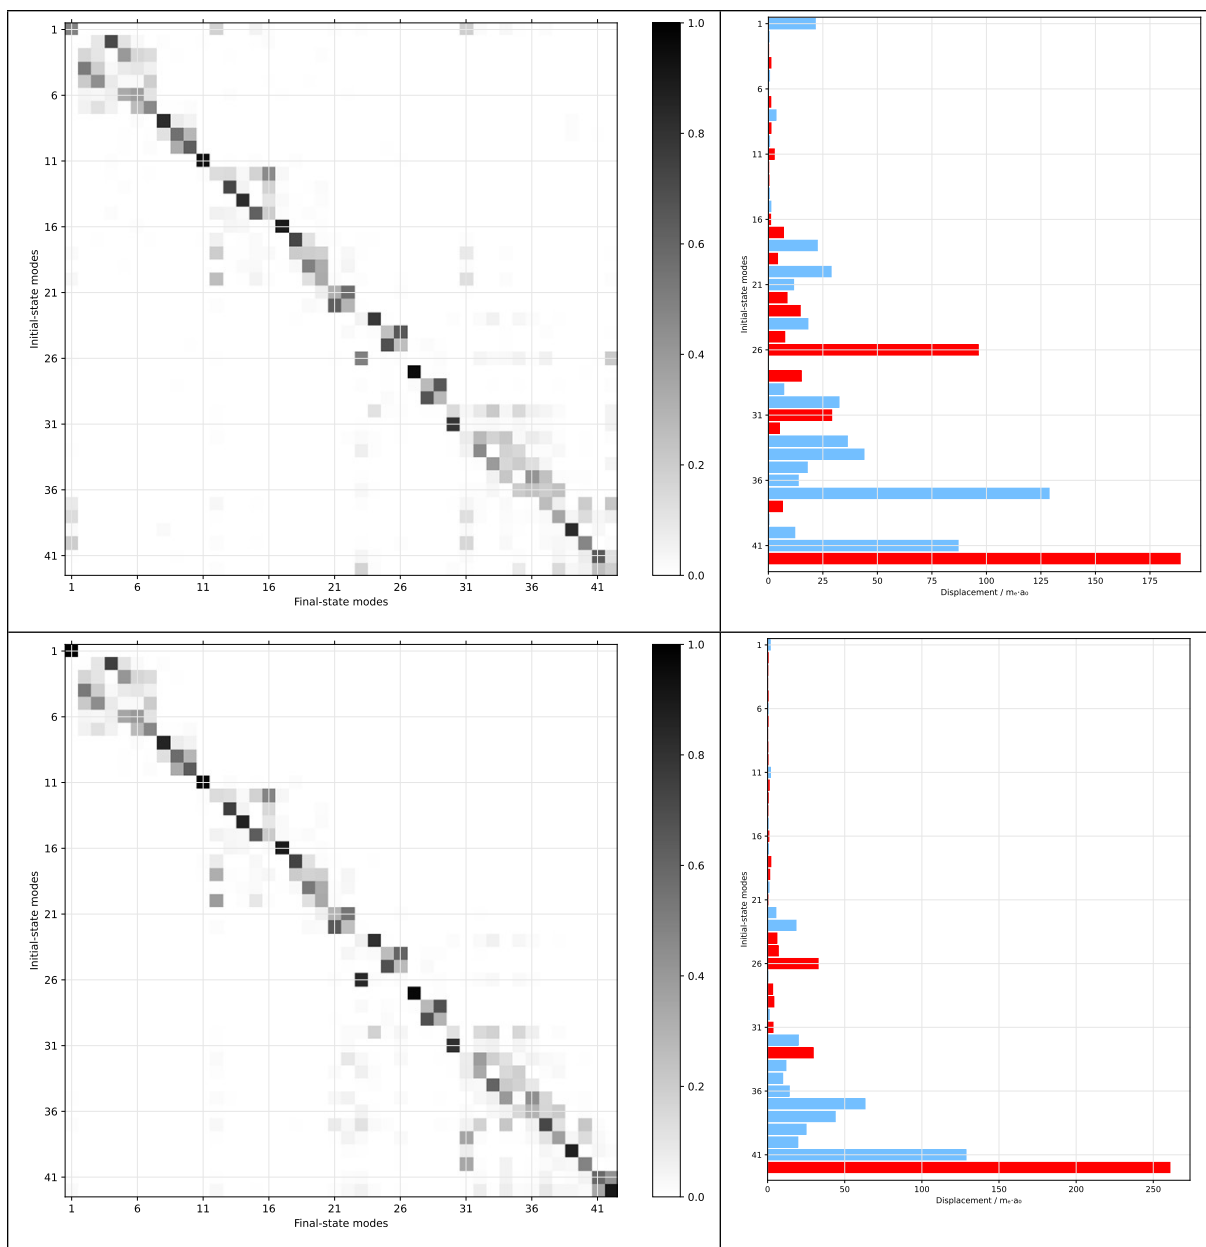

FIGURE S7: Duschinsky matrix (left panels) and shift vector (right panels) relative to the PES spectrum of tBuOOH at the PBE0/aug-cc-pVTZ level. In the top panels, Cartesian coordinates are used for the definition of the normal modes. In the bottom panels, the basis are primitive internal coordinates. The Duschinsky matrix ( $J$ ) is represented by squaring each element and attributing a shade of gray based on its value (0: white, 1: black). For the shift vector ( $K$ ), the absolute value is displayed to compare the magnitude of the shift along each normal coordinate. A blue color indicates a positive value, red for negative.

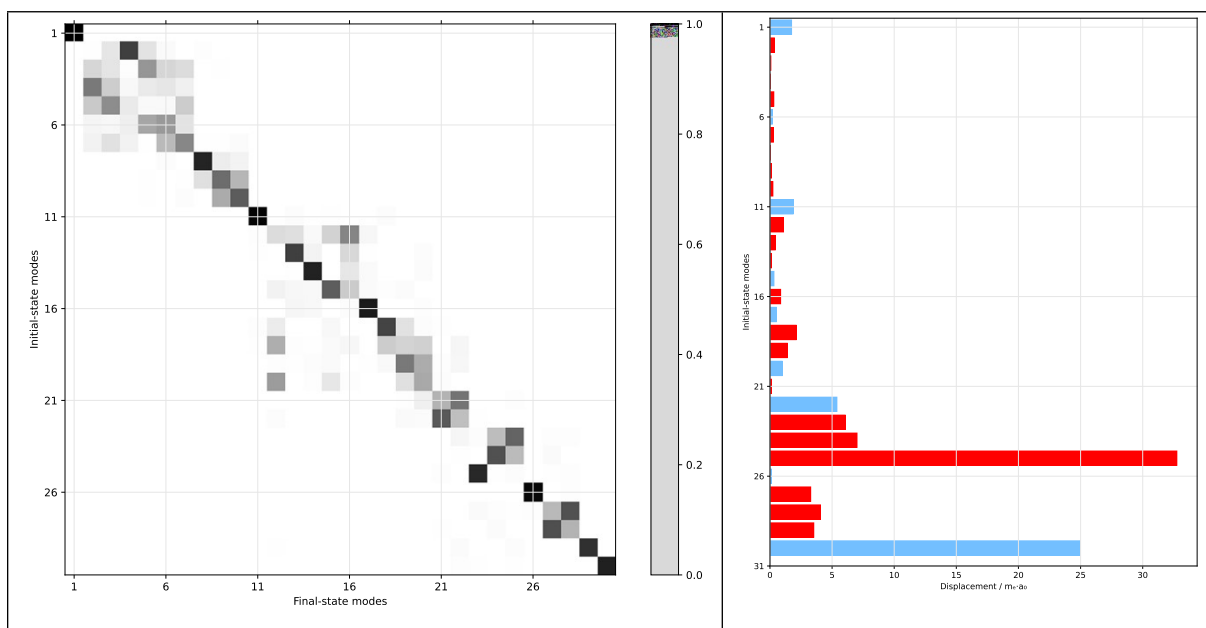

FIGURE S8: Duschinsky matrix (left panels) and shift vector (right panels) relative to the PES spectrum of tBuOOH at the PBE0/aug-cc-pVTZ level for the final reduced-dimensionality scheme. See FIGURE S7 for details.
